# Network potential identifies therapeutic *miRNA* cocktails in Ewing sarcoma

Davis T. Weaver<sup>1,2,\*</sup>, Kathleen I. Pishas<sup>3,\*</sup>, Drew Williamson<sup>4,\*</sup>, Jessica Scarborough<sup>1,2</sup>, Stephen L. Lessnick<sup>5</sup>, Andrew Dhawan<sup>2,6,†</sup>, and Jacob G. Scott<sup>1,2,7,†</sup>

<sup>1</sup>Case Western Reserve University School of Medicine, Cleveland, OH, 44106, USA

<sup>2</sup>Translational Hematology Oncology Research, Cleveland Clinic, Cleveland OH, 44106, USA

<sup>3</sup>Peter MacCallum Cancer Centre, Melbourne, Australia, 3000

<sup>4</sup>Department of Pathology, Brigham & Women's Hospital, Boston, MA, 02144

<sup>5</sup>Nationwide Children's Hospital, Columbus, Ohio, 43205

<sup>6</sup>Division of Neurology, Cleveland Clinic, Cleveland Ohio, 44195

<sup>7</sup>Department of Physics, Case Western Reserve University, Cleveland, OH, 44106, USA

\*contributed equally

†dhawana@ccf.org, scottj10@ccf.org

## ABSTRACT

MicroRNA (miRNA)-based therapies are an emerging class of targeted therapeutics with many potential applications. Ewing Sarcoma patients could benefit dramatically from personalized miRNA therapy due to inter-patient heterogeneity and a lack of druggable (to this point) targets. However, because of the broad effects miRNAs may have on different cells and tissues, trials of miRNA therapies have struggled due to severe toxicity and unanticipated immune response. In order to overcome this hurdle, a network science-based approach is well-equipped to evaluate and identify miRNA candidates and combinations of candidates for the repression of key oncogenic targets while avoiding repression of essential housekeeping genes. We first characterized 6 Ewing sarcoma cell lines using mRNA sequencing. We then estimated a measure of tumor state, which we term network potential, based on both the mRNA gene expression and the underlying protein-protein interaction network in the tumor. Next, we ranked mRNA targets based on their contribution to network potential. We then identified miRNAs and combinations of miRNAs that preferentially act to repress mRNA targets with the greatest influence on network potential. Our analysis identified TRIM25, APP, ELAV1, RNF4, and HNRNPL as ideal mRNA targets for Ewing sarcoma therapy. Using predicted miRNA-mRNA target mappings, we identified miR-3613-3p, let-7a-3p, miR-300, miR-424-5p, and let-7b-3p as candidate optimal miRNAs for preferential repression of these targets. Ultimately, our work, as exemplified in the case of Ewing sarcoma, describes a novel pipeline by which personalized miRNA cocktails can be designed to maximally perturb gene networks contributing to cancer progression.

**Conflict of Interest Statement:** The authors have no conflicts of interest to disclose.

## Introduction

Ewing sarcoma is a rare malignancy arising from a gene fusion secondary to rearrangements involving the EWS gene<sup>1</sup>. There are 200-300 reported cases each year in the United States, disproportionately affecting children<sup>2</sup>. High levels of inter-tumor heterogeneity are observed among Ewing sarcoma patients despite a shared EWS gene fusion initiating event<sup>3</sup>. Ewing sarcoma is also extremely prone to developing resistance to available chemotherapeutics<sup>4</sup>. These features make it an ideal system to develop personalized therapies for resistant tumors or to avoid the development of resistance altogether.

MicroRNA (miRNA)-based therapeutics, including anti-sense oligonucleotides, are an emerging class of cancer therapy<sup>5</sup>. Recent work has highlighted the critical importance of miRNAs in the development and maintenance of the cancer phenotype<sup>4-6</sup>. MiRNA dysregulation has been implicated in the development of each of the hallmark features of cancer<sup>7</sup>, and restoration of expression of some of these critical downregulated miRNAs has been studied as a potential treatment for several different cancers<sup>6,8,9</sup>. In particular, in the past decade, anti-sense oligonucleotide inhibitors of the STAT3 transcription factor have shown promise in the settings of lymphoma<sup>10,11</sup> and neuroblastoma<sup>12</sup>. MiR-34 has shown to be effective in pre-clinical studies for treatment of both lung cancer<sup>13-15</sup> and prostate cancer<sup>16</sup>. Finally, miR-34 and let-7 combination therapy has been shown to be effective in pre-clinical studies of lung cancer<sup>15</sup>.

MiRNAs have been recognized as potential high-value therapeutics in part due to their ability to cause widespread changes in a cell-signaling network<sup>5</sup>. A single miRNA molecule can bind to and repress multiple mRNA transcripts<sup>6,17-19</sup>, a property

that can be exploited when designing therapy to maximally disrupt a cancer cell signaling network. This promiscuity of miRNA

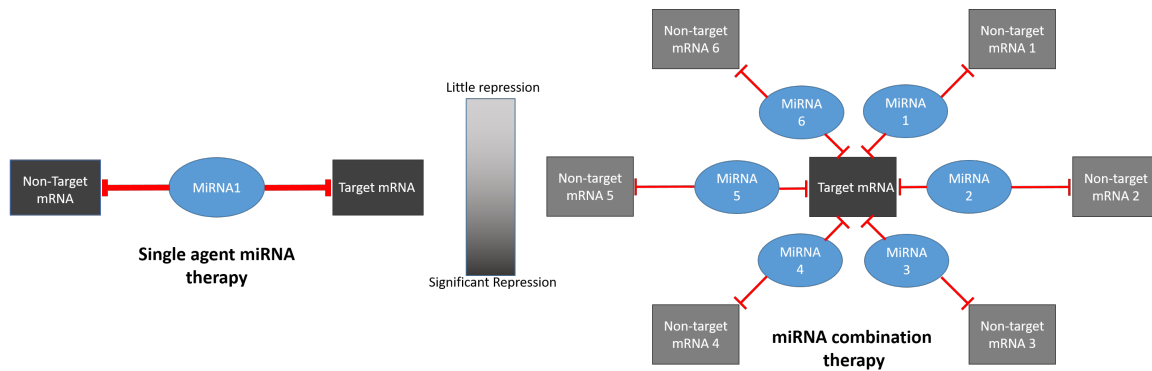

**Figure 1. Cartoon describing rationale for focusing on miRNA combination therapy.** With single-agent therapy, both target mRNA and non-target mRNA are inhibited an equal amount, potentially resulting in toxicity due to off-target effects. With miRNA combination therapy, the common target mRNA is inhibited to a greater degree than any individual non-target miRNA.

18  
19 binding may also increase the risk of off-target effects and toxicity (Figure 1). For example, miR-34 was effective in pre-clinical  
20 studies for the treatment of a variety of solid tumors<sup>13-16</sup>, only to fail in a phase I clinical trial due to “immune-related serious  
21 adverse events”<sup>20</sup>. To capitalize on the promise of miRNA-based cancer therapy while limiting potential toxicity, we developed  
22 a systematic, network-based approach to evaluate miRNA cocktails. We focused on miRNA cocktails rather than single miRNA  
23 therapeutics due to the potential for miRNA cocktails to minimize toxicity compared to single miRNA regimens (Figure 1).

24 In this work, we build on previous studies applying thermodynamic measures to cell signaling networks in the field of  
25 cancer biology<sup>21-23</sup>, as well as works that describe a method to use gene homology to map miRNAs to the mRNA transcripts  
26 they likely repress<sup>6,17,18</sup>. Reitman et al. previously described a metric of cell state analogous to Gibbs free energy that can  
27 be calculated using the protein-protein interaction network of human cells and corresponding transcriptomic data<sup>21</sup>. Gibbs  
28 free energy has been correlated with a number of cancer-specific outcomes, including cancer grade and patient survival<sup>22</sup>.  
29 Additionally, Reitman et al. leveraged Gibbs and other network measures to identify personalized protein targets for therapy  
30 in a dataset of low-grade glioma patients from The Cancer Genome Atlas (TCGA)<sup>21</sup>. Previous work has also highlighted the  
31 critical importance of miRNAs to maintenance and development of the oncogenic phenotype, and demonstrated the utility of  
32 applying miRNA-mRNA mappings.<sup>6</sup> In this work, we developed and applied a computational pipeline that leverages these  
33 network principles to identify miRNA cocktails for the treatment of Ewing sarcoma.

## 34 1 Methods

### 35 1.1 Overview

36 We characterized six previously described Ewing sarcoma cell lines in triplicate<sup>24</sup> – A673, ES2, EWS502, TC252, TC32,  
37 and TC71 – using mRNA sequencing. By evaluating 6 distinct cell lines, we aimed to assess the heterogeneity inherent to  
38 Ewing sarcoma. We then defined a measure of tumor state, which we term network potential (Equation 1), based on both  
39 mRNA gene expression and the underlying protein-protein interaction (PPI) network. Next, we ranked mRNA targets based  
40 on their contribution to network potential of each cell line, aiming to approximate the relative importance of each mRNA to  
41 network stability. Relative importance of each mRNA to network stability was determined by calculating the change in network  
42 potential of each network before and after *in silico* repression of each mRNA ( $\Delta G$ , described in Section 1.5). After identifying  
43 these mRNA targets, we then identified miRNA and miRNA cocktails that preferentially acted to repress the most influential of  
44 the ranked mRNA targets, with the aim of defining synthetic miRNA-based therapy for down-regulation of these targets. Our  
45 computational pipeline is schematized in Figure 2.

### 46 1.2 Data sources

47 We utilized two data sources to develop our Ewing sarcoma cell signaling networks: the BioGRID protein-protein interaction  
48 database<sup>25</sup> and mRNA expression data from 6 Ewing sarcoma cell lines, which are available on GEO (accession GSE98787).

49 **BioGRID** The BioGRID interaction database contains curated data detailing known interactions between proteins for a variety  
50 of different species, including Homo sapiens. The data were generated by manual curation of the biomedical literature to  
51 identify documented interactions between proteins<sup>25</sup>. To assist in manual curation, the BioGRID project uses a natural language

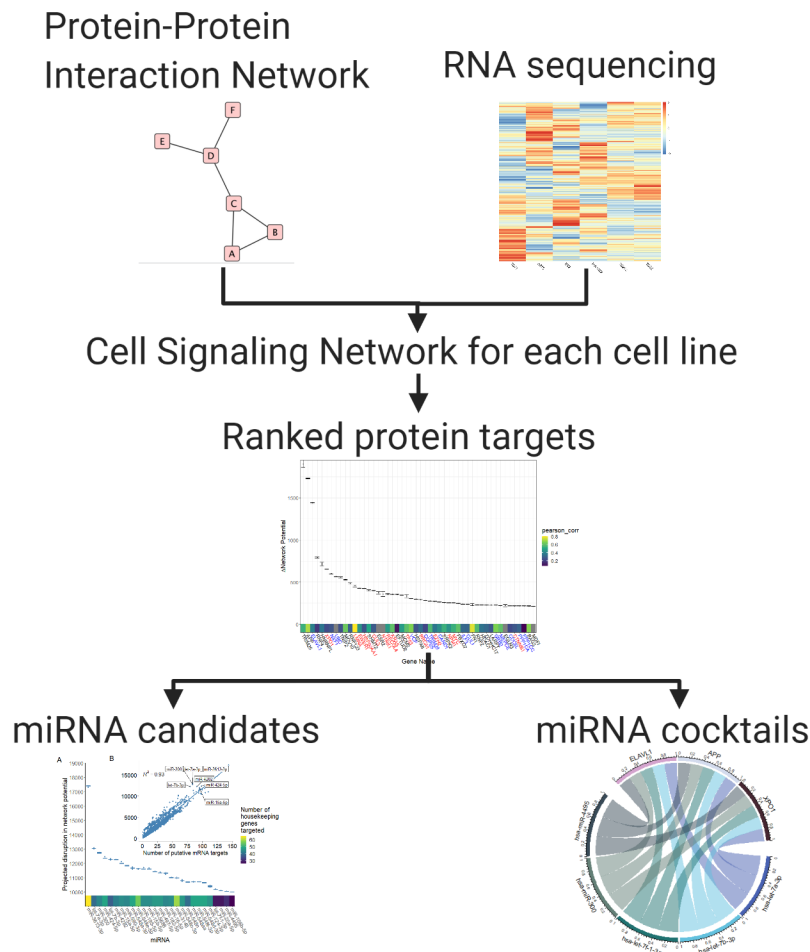

**Figure 2. Simplified schematic of our computational pipeline.** We defined a measure of tumor state, which we term network potential (Equation 1), based on both mRNA gene expression and the underlying protein-protein interaction (PPI) network. Next, we ranked mRNA targets based on their contribution to network potential of each cell line, aiming to approximate the relative importance of each mRNA to network stability. After identifying these mRNA targets, we then identified miRNA and miRNA cocktails that preferentially acted to repress the most influential of the ranked mRNA targets, with the aim of defining synthetic miRNA-based therapy for down-regulation of these targets.

52 processing algorithm that analyzes the scientific literature to identify manuscripts likely to contain information about novel  
53 PPIs. The dataset is therefore limited to protein interactions that are reliably reported in the scientific literature. As new  
54 research accumulates, substantial changes to the PPI network may occur. For example, between 2016 and 2018, the number  
55 of documented PPIs in *Homo sapiens* grew from 365,547 to 449,842. The 449,842 documented interactions in 2018 were  
56 identified through curation of 27,631 publications<sup>25</sup>. Importantly, the PPI network is designed to represent normal human  
57 tissue.

58 **Ewing sarcoma transcriptomics** Second, we utilized mRNA expression data from *in vitro* experiments conducted on six  
59 Ewing sarcoma cell lines (3 biological replicates per cell line). RNA/miRNA extraction was performed with a Qiagen kit with  
60 on-column DNase digestion. These mRNA and miRNA expression data were then normalized to account for between sample  
61 differences in data processing and further adjusted using a regularized log (Rlog) transformation<sup>26,27</sup>. Notably, methods for  
62 calculating network potential from this type of data require protein concentrations rather than mRNA transcript concentrations.  
63 For the purposes of this analysis, we assumed that concentration of protein in an Ewing sarcoma tumor was equivalent to  
64 the concentration of the relevant mRNA transcript. A large body of work suggests that mRNA levels are the primary driver  
65 of protein levels in a cell under steady state conditions (i.e. not undergoing proliferation, response to stress, differentiation  
66 etc)<sup>28-31</sup>. However, recent work in a 375 cancer cell lines has shown that mRNA expression may not be predictive of protein  
67 expression in the setting of malignancy<sup>32</sup>. For this reason, we included the protein-mRNA correlations from their experiments

68 alongside some of our key findings to provide needed context.

### 69 1.3 Network development

70 We first developed a generic network to represent human cell signaling networks using the BioGRID interaction database<sup>25</sup>.  
71 The BioGRID protein-protein interaction network can be downloaded as a non-linear data structure containing ordered pairs of  
72 proteins and all the other proteins with which they interact. This data structure can be represented as an undirected graph, with  
73 vertex set  $\mathcal{V}$ , where each vertex represents a protein, and edge set ( $\mathcal{E}$ ) describes the interactions between proteins.

74 Using RNA sequencing data from 6 Ewing sarcoma cell lines in triplicate, we then ascribed mRNA transcript concentration  
75 for each gene as an attribute to represent the protein concentration for each node in the graph. Through this process, we  
76 developed networks specific to each cell line and replicate in our study (18 total samples).

### 77 1.4 Network potential calculation

78 Using the cell signaling network with attached cell line and replicate number specific normalized mRNA expression data, we  
79 defined a measure of tumor state following Reitman et al.<sup>21</sup>, which we term network potential. We first calculate the network  
80 potential of the  $i$ -th node in the graph:

$$G_i = C_i \ln \left[ \frac{C_i}{\sum C_j + C_i} \right]. \quad (1)$$

81 where  $G_i$  is equal to the network potential of an individual node of the graph,  $C_i$  is equal to the concentration of protein  
82 corresponding to node  $G_i$ , and  $C_j$  is the concentration of protein of the  $j$ -th neighbor of  $G_i$ . Total network potential ( $G$ ) of the  
83 network can then be calculated as the sum over all nodes:

$$G = \sum_i G_i. \quad (2)$$

84 where  $G$  is equal to the total network potential for each biological replicate of a given cell line. We then compared total network  
85 potential across cell lines and biological replicates.

### 86 1.5 Ranking of protein targets

87 After calculating network potential for each node and the full network, we simulated "repression" of every node in each network  
88 by reducing their expression (computationally) to zero, individually<sup>33</sup>. Clinically, this would be akin to the application of a  
89 drug that perfectly inhibited the protein/mRNA of interest. Next, we re-calculated network potential for the full network and  
90 calculated the change in network potential ( $\Delta G$ ) by subtracting the new network potential value for the network potential value  
91 of the "unrepressed" network. We then ranked each node in the network according to the change in network potential for further  
92 analysis. Our pipeline was designed to make use of parallel computing on the high-performance cluster (HPC) at Case Western  
93 Reserve University in order to complete these analyses.

### 94 1.6 Identification of miRNA cocktails

95 To generate miRNA-mRNA mappings, we implemented a protocol described previously<sup>34</sup>. Briefly, we identified all predicted  
96 mRNA targets for each miRNA in our dataset using the miRNAatp database in R, version 1.18.0, as implemented through the  
97 Bioconductor targetscan.org.Hs.eg.db package, version 3.8.2<sup>17</sup>. We used all five possible databases (default settings): DIANA  
98 version 5.061<sup>19</sup>, Miranda 2010 release62<sup>35</sup>, PicTar 2005 release63<sup>36</sup>, TargetScan 7.164<sup>37</sup> and miRDB 5.065<sup>18</sup>, with a minimum  
99 source number of 2, and the union of all targets found was taken as the set of targets for a given miRNA. Through this mapping,  
100 we identified a list of mRNA transcripts that are predicted to be repressed by a given miRNA. Our code and processed data files  
101 are available on [Github](https://github.com/DavisWeaver/MiR_Combos_Targeting/) at: [https://github.com/DavisWeaver/MiR\\_Combos\\_Targeting/](https://github.com/DavisWeaver/MiR_Combos_Targeting/).

102 Using this mapping, as well as our ranked list of promising gene candidates for repression from our network analysis, we  
103 were able to identify a list of miRNA that we predict would maximally disrupt the Ewing sarcoma cell signaling network when  
104 introduced synthetically. To rank miRNA targets, we first identified all the genes on the full target list that a given miRNA was  
105 predicted to repress (described in Section 1.5). Next, we summed the predicted  $\Delta G$  when each of these genes was repressed *in*  
106 *silico* to generate the maximum potential disruption that could be achieved if a given miRNA were introduced synthetically  
107 into an Ewing sarcoma tumor. We then ranked miRNA candidates in descending order of the maximum predicted network  
108 disruption (Figure 6).

109 Given the documented cases of systemic toxicities associated with miRNA-based therapies, the miRNA that inhibits the  
110 most targets might not necessarily be the best drug target. We therefore sought to identify combinations of miRNAs that

111 individually repressed key drug targets, while avoiding repression of housekeeping genes that may lead to toxicity. We defined  
112 housekeeping genes using a previously described gene set<sup>38</sup>. In this study, housekeeping genes were identified by evaluating  
113 RNA sequencing data from a large number of normal tissue samples. Genes that are consistently expressed in all or nearly all  
114 tissue types were assumed to be so-called housekeeping genes. Our hypothesis is that by giving a cocktail of miRNAs with  
115 predicted activity against one or multiple identified drug targets, each individual miRNA could be given at a low dose such that  
116 only the mRNA transcripts that are targeted by multiple miRNAs in the cocktail are affected (Figure 1)

117 We first transformed the projected change in network potential for each gene such that housekeeping genes exerted a positive  
118 change in network potential and the top 10 predicted targets exerted a negative change in network potential. We then ranked  
119 3-miRNA combinations according to their projected effect on network potential, where more negative changes in network  
120 potential were interpreted as most effective for maximizing on-target effects while minimizing off-target effects. As a further  
121 constraint, a gene had to be targeted by 2 or more miRNA in a given cocktail to be considered repressed. Each miRNA was  
122 assumed to downregulate a given gene by 20%, such that genes targeted by 2 miRNAs were assumed to have their expression  
123 decreased by 40%, and genes targeted by 3 miRNAs were assumed to have their expression decreased by 60%. We repeated our  
124 analysis, varying between 10% and 50% repression to assess the impact of this assumption on our predicted miRNA cocktails.  
125 Rather than evaluate every potential 3-miRNA combination, we limited our analysis to miRNA that target at least 2 of our  
126 10 target genes. We repeated this analysis to identify cocktails that target larger or smaller groups of mRNA (the top 5 or 15  
127 mRNA targets) in order to assess the stability of the predicted cocktail to changing conditions.

## 128 2 Results

### 129 2.1 Network Overview

130 We calculated the network potential, a unitless measure of cell state, for each protein in the cell signaling networks for each  
131 of the six Ewing sarcoma cell lines in our experiment. An overview of the total network potential for each cell line and  
132 evolutionary replicate compared to total mRNA expression is presented in Figure 3. The histograms of network potential and  
133 mRNA expression demonstrate markedly different distributions (Figure 3A and Figure 3B), indicating that network potential  
134 describes different features of a cell signaling network compared to mRNA expression alone. Notably, network potential and  
135 mRNA expression for these cell lines are stable across different biological replicates, as demonstrated by the low interquartile  
136 range (Figure 3C and 3D). There were larger differences in both mean expression and network potential across cell lines (Figure  
137 3C and 3D) when compared to between-replicate differences. The global average network potential across all samples was  
138  $-3.4 \times 10^5$  with a standard deviation of 1605.

### 139 2.2 Identification of Protein Targets

140 We identified TRIM25, APP, ELAV1, RNF4, and HNRNNPL as top 5 targets for therapy for each of the 6 cell lines based on  
141 the degree of network disruption induced following *in silico* repression of each gene. There was a high degree of concordance  
142 between cell lines among the top predicted targets, indicating that these targets may be conserved across Ewing sarcoma  
143 (Table S1). Of the top ten predicted targets, all 10 targets are conserved for all 6 cell lines. The top 50 protein targets are  
144 presented in Figure 4. Some of these identified genes may be essential housekeeping genes highly expressed in all or most cells  
145 in the body, making them inappropriate drug targets. TRIM25, and ELAV1, for example, are involved in protein modification  
146 and RNA binding, respectively<sup>39</sup>. We therefore repeated this analysis, limiting our search to gene targets that have been causally  
147 implicated in cancer<sup>40</sup>. With this limitation in place, we identified XPO1, LMNA, EWSR1, HSP90AA1, and CUL3 as the top 5  
148 targets for therapy when  $\Delta G$  was averaged for all cell lines. The top 10 cancer-related targets for each cell line can be found in  
149 (Table S2). The top 50 protein targets (limited to those causally implicated in cancer) can be found in Figure S1.

150 We also conducted gene set enrichment analysis for the all the genes represented in our cell signaling network (averaged  
151 across all samples). We ranked genes by network potential (averaged across all samples) and compared our gene set to the  
152 “hallmarks” pathways set, downloaded from the Molecular Signatures Database (MSigDB)<sup>41,42</sup>. This analysis was conducted  
153 using the fGSEA package in R, which uses the Benjamini - Hochberg procedure to correct the false discovery rate<sup>43,44</sup>. Our gene  
154 set was enriched (adjusted p-value < 0.05) in 24 of the 50 pathways included in the hallmarks set; including apoptosis, DNA  
155 repair, mTOR signaling, MYC signaling, and WNT  $\beta$ -catenin signaling. Our gene set was also highly enriched (normalized  
156 enrichment score = 1.73) in the miRNA bio-genesis pathway. The full results are presented in Table S3.

### 157 2.3 Identification of miRNA Cocktails

158 We identified several miRNAs that were predicted to dramatically disrupt the Ewing sarcoma cell signaling network (Figure 6).  
159 When averaging all cell lines, we identified miR-3613-3p, let-7a-3p, miR-300, miR-424-5p, and let-7b-3p as the ideal miRNAs  
160 for preferential repression of proteins predicted to be important for Ewing sarcoma signaling network stability. miR-3613-3p,  
161 let-7a-3p, miR-300, miR-424-5p, and let-7b-3p were predicted to cause an average network network potential increase (driving  
162 the system less negative) of 17382, 13034, 12746, 12364 and 12280, respectively (see Figure 6). It should also be noted that we



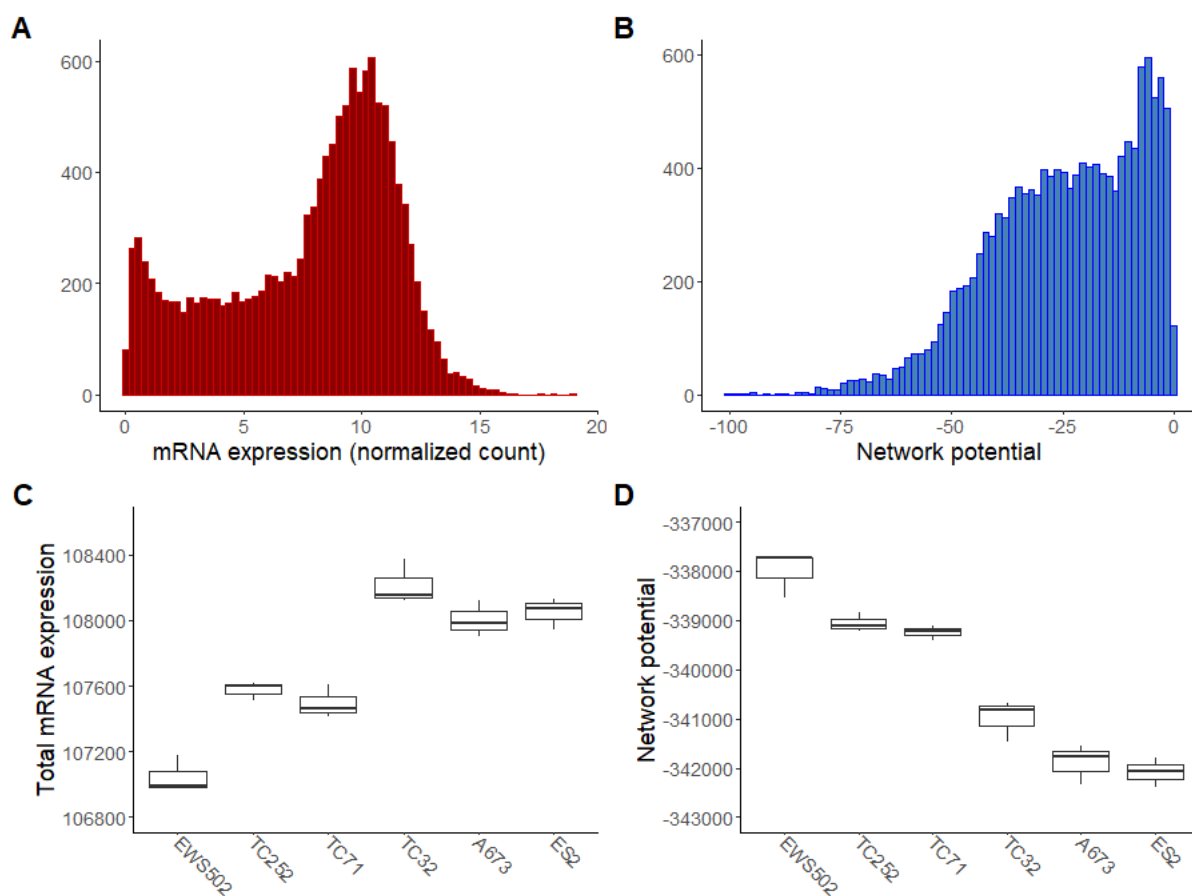

**Figure 3. Network potential describes different features of a cell signaling network compared to mRNA expression alone.** **Panel A:** Histogram of mRNA expression for each gene (averaged across all samples). **Panel B:** Histogram of the network potential for each gene (averaged across all samples) mRNA transcripts with an expression level of zero were excluded from both histograms to better visualize the distribution of genes that are expressed. **Panel C:** Box plot showing the total mRNA expression for each cell line. **Panel D:** Box plot showing the total network potential for each cell line.

163 were able to identify a substantial number of miRNAs with potential activity against the Ewing sarcoma cell signaling network.  
164 We identified 27 miRNAs with an average predicted network potential disruption of greater than 10,000. For comparison, the  
165 largest network change in network potential that could be achieved with a single gene repression across all cell lines was just  
166 2064 (TRIM25).

167 These individual miRNAs target large numbers of transcripts in the cell and therefore may be difficult to administer  
168 as single-agents due to extreme toxicity. For example, the top miR candidate, miR-3613-3p, was predicted to repress 144  
169 distinct mRNA transcripts in the full target set. We therefore sought to identify cocktails of miRNA that could cooperatively  
170 down-regulate key non-housekeeping genes while avoiding cooperative down-regulation of housekeeping genes that may be  
171 associated with toxicity. When targeting the top 10 predicted proteins from our *in silico* repression experiments, a 3 miRNA  
172 cocktail of miR-483-3p, miR-379-3p, and miR-345-5p was predicted to be the most optimal across all cell lines (Figure 5A  
173 and Figure 5B). Under the same conditions, a 3-miR cocktail of miR-300, let-7b-3p, and let-7a-3p was predicted to be the  
174 least optimal among 16,215 tested combinations (Figure 5C and Figure 5D). Notably, the most and least optimal miRNA  
175 combinations had similar activity against the 10 targets (Figure 5A and Figure 5C). The worst cocktail was defined by high  
176 levels of cooperative downregulation of housekeeping genes rather than lack of efficacy against putative targets (Figure 5C and  
177 Figure 5D). Let-7b-3p and let-7a-3p were heavily represented in the least optimal cocktails tested, appearing in 10 of the 10  
178 worst 3 miRNA cocktails (Figure 5E). These highly promiscuous miRNA target large numbers of housekeeping genes, limiting  
179 their therapeutic utility alone or in combination (Figure 6B).

180 Notably, many of the most promising miRNA when considering only their total predicted network disruption tend to appear

181 in the least optimal cocktails (Figure 6). This likely occurs because these miRNA tend to target large numbers of housekeeping  
182 genes and large numbers of genes overall. In contrast, the best miRNA cocktails tend to be composed of miRNA that target  
183 relatively few genes overall but exhibit some degree of target specificity. Put another way, they target the desired target  
184 genes while repressing relatively few essential housekeeping genes. An extreme example of this is the case of miR-345-5p.  
185 MiR-345-3p is in the bottom 50% of all miRNA when ranked by predicted network disruption, and is only predicted to repress  
186 10 different transcripts. However, because it selectively targets several of our targets of interest, this relative small total projected  
187 network disruption is actually an attractive feature that makes it easy to build effective cocktails that include miR-345-3p. As a  
188 result, miR-345-3p appears in 8 of the top 10 predicted 3 miRNA cocktails. To assess the stability of our results, we repeated  
189 this analysis, focusing on the top 5 or top 15 predicted protein targets. We also repeated this analysis, assuming 10 % and 50%  
190 repression per miRNA that target a given mRNA. The top and bottom predicted cocktails were similar across these conditions  
191 and across all six cell lines. We have included the full ranked list of all miRNA cocktails tested across all conditions on [Github](#)

### 192 3 Discussion

193 In this work, we described a novel methodology for the identification of potential miRNA cocktails for Ewing sarcoma therapy.  
194 First, we performed mRNA sequencing on six Ewing sarcoma cell lines (GEO accession GSE98787). We then defined a metric  
195 of cell state, network potential, based on mRNA expression and signaling network topology. Using *in silico* repression and  
196 change in network potential, we identified the most important proteins in the cell signaling network for each of the 6 cell  
197 lines. Notably, this set of proteins was enriched in 24 of the 50 pathways included in the “halmarks” gene set<sup>41,42</sup>. The ranked  
198 protein set was also enriched for genes involved in the canonical miRNA biogenesis pathway<sup>6</sup>. We then evaluated more than  
199 16000 3-miRNA cocktails (per cell line) based on predicted ability to disrupt key proteins in the Ewing Sarcoma cell signaling  
200 network while avoiding cooperative down-regulation of essential housekeeping genes. We ranked these 3-miRNA cocktails to  
201 identify promising miRNA combinations for therapy of Ewing Sarcoma.

202 The protein targets and miRNA candidates we identified in our dataset are consistent with the literature on Ewing sarcoma  
203 and cancer cell signaling, suggesting biological plausibility of our methodology. Of the top 50 protein targets that we identified,

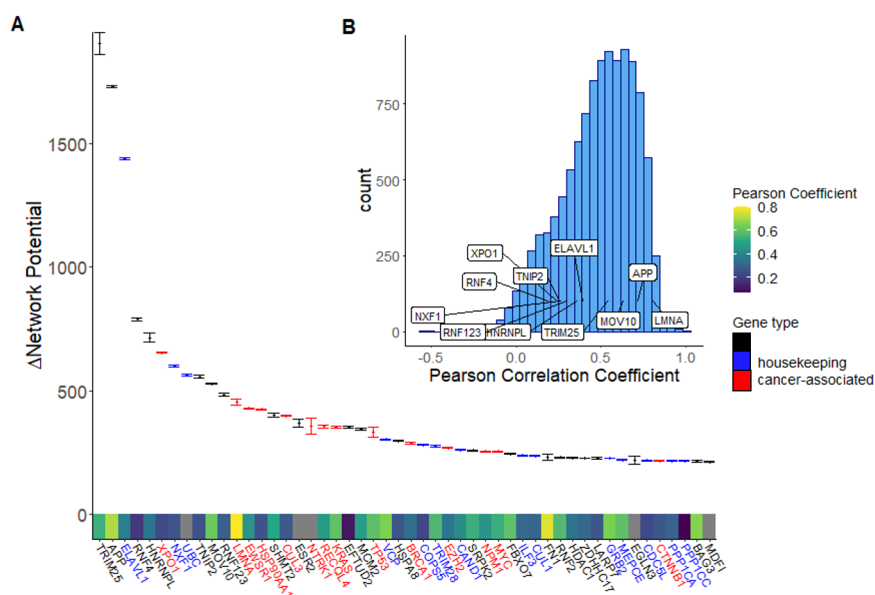

**Figure 4. TRIM25, APP, ELAVL1, AND RNF4, and XPO1 are the top protein targets ranked by predicted disruption following *in silico* repression. Panel A:** Box and whisker plot describing the change in network potential following *in silico* repression for each of the top 50 proteins. It is notable that EWSR1, the kinase associated with Ewing sarcoma development, is considered highly influential in the cell signaling network by this method. Genes that have previously been causally implicated in cancer according to the Cosmic database are highlighted in red<sup>40</sup>. Essential housekeeping genes (excluding those that are causally implicated in cancer) are highlighted in blue. The heatmap on the x-axis corresponds to the protein-mRNA correlation of each gene in the Cancer Cell Line Encyclopedia<sup>32</sup>. **Panel B:** Histogram depicting the distribution of Pearson correlation between mRNA expression and protein expression from the Cancer Cell Line Encyclopedia for all nodes included in our final Ewing sarcoma cell signaling networks. Proteins that were ranked particularly highly in panel A were labeled in panel B.

204 15 were previously causally implicated in cancer<sup>40</sup>, including EWSR1, the proposed driver of Ewing sarcoma development. In  
205 addition, our network-based approach suggests that known oncogenic hub genes such as KRAS and MYC are prime targets for  
206 disruption in cancer cells.

207 In addition, many of the miRNA we identified as potential therapeutic candidates have been previously studied due to their  
208 association with cancer outcomes, including members of the let-7 family, miR-300, miR-424-5p, miR-4282, miR-15a-5p, and  
209 miR-590-3p. Loss of expression of the let-7 family of miRNA has been widely implicated in cancer development<sup>45-48</sup>. In  
210 Ewing sarcoma specifically, low levels of let-7 family miRNA have been correlated with disease progression or recurrence<sup>45</sup>.  
211 The let-7 family of miRNA have also been studied as treatment for non-small cell lung cancer in the pre-clinical setting<sup>15</sup>.  
212 Loss of miR-300 has been previously correlated with development and aggressiveness of hepatocellular carcinoma<sup>49</sup> as well  
213 as in oncogenesis of pituitary tumors<sup>50</sup>. Reduced expression of miR-424-5p and miR-4282 have each been implicated in the  
214 development of basal-like breast cancer<sup>51,52</sup>. MiR-15a-5p has been shown to have anti-melanoma activity<sup>53</sup>. In addition,  
215 miR-590-3p has been shown to suppress proliferation of both breast cancer<sup>54</sup>, and hepatocellular carcinoma<sup>55</sup>. The broad  
216 literature linking many of our proposed miRNA candidates for Ewing sarcoma treatment to the development and maintenance  
217 of cancer highlights the ability of our computational pipeline to identify potentially promising therapeutic candidates in this  
218 setting. Prior to application of these findings for treatment of Ewing sarcoma or any other disease, specific *in vitro* and *in vivo*  
219 validation is needed.

220 The process by which putative miRNA targets were selected was based on sequence homology rather than direct experimental  
221 validation. As a result, it is possible that we included false positive miRNA targets in our analysis. For this study we relied on a  
222 protein-protein interaction network presumably curated from analyzing normal human cells. It is possible that the derangements  
223 observed in cancer cells could change the underlying interaction network of a tumor cell. In the future, it may be possible to  
224 utilize protein-protein interaction networks specific to cancer or even specific to the cancer type under study. We also used  
225 mRNA concentration as a surrogate for protein concentration in designing our cell signaling network. While this is not true  
226 in all cases, it is likely a reasonable approximation under steady state conditions<sup>28-31</sup> (see Section 1.2 for more details). In  
227 addition, protein-mRNA correlations in the cancer cell line atlas for the top proteins identified by our pipeline were fairly good,  
228 ranging from 0.07 to 0.8 for the top 50 identified protein targets.<sup>32</sup> (Fig S1).

229 Despite these limitations, our findings may facilitate the development of novel therapies for patients suffering from Ewing  
230 Sarcoma. To this point, severe toxicity has limited the translation of miRNA-based cancer therapies to the clinical setting. Our  
231 pipeline may enable the development of better miRNA therapies that clear this hurdle and open up this promising avenue of  
232 therapy for patients suffering from cancer. In addition, this novel method can facilitate the rapid identification of key proteins in  
233 any cancer cell signaling network for which mRNA sequencing data is available. This may facilitate more rapid drug discovery  
234 and assist in the discovery of proteins and miRNA that play a significant role in the cancer disease process.

## 235 Acknowledgments

236 We acknowledge experimental support from Julia Selich-Anderson. JGS thanks the NIH for their support through NIH  
237 R37CA244613, their Loan Repayment Program, and the Paul Calabresi Career Development Award for Clinical Oncology  
238 (NIH K12CA076917). KIP acknowledges financial support from the NHMRC CJ Martin Overseas Biomedical Fellowship  
239 (APP1111032) and Alex's Lemonade Stand Young Investigator Grant (APP37138). DTW acknowledges financial support from  
240 the Cancer Center Trainee Award for Cancer Research from the Case Comprehensive Cancer Center. This work made use of  
241 the High Performance Computing Resource in the Core Facility for Advanced Research Computing at Case Western Reserve  
242 University. JS acknowledges financial support from the NIH for their support through NIH T32GM007250.

## 243 Code and data availability

244 All of the software we developed for this project can be found on [Github](https://github.com/DavisWeaver/MiR_Combo_Targeting). ([https://github.com/DavisWeaver/MiR\\_Combo\\_Targeting](https://github.com/DavisWeaver/MiR_Combo_Targeting)).  
245 All processed data needed for reproduction of the results of the paper are available in the same repository. We have also  
246 included an Rmarkdown version of the pre-print to aid in reproducibility. All raw data files were published on GEA (accession  
247 number GSE98787).



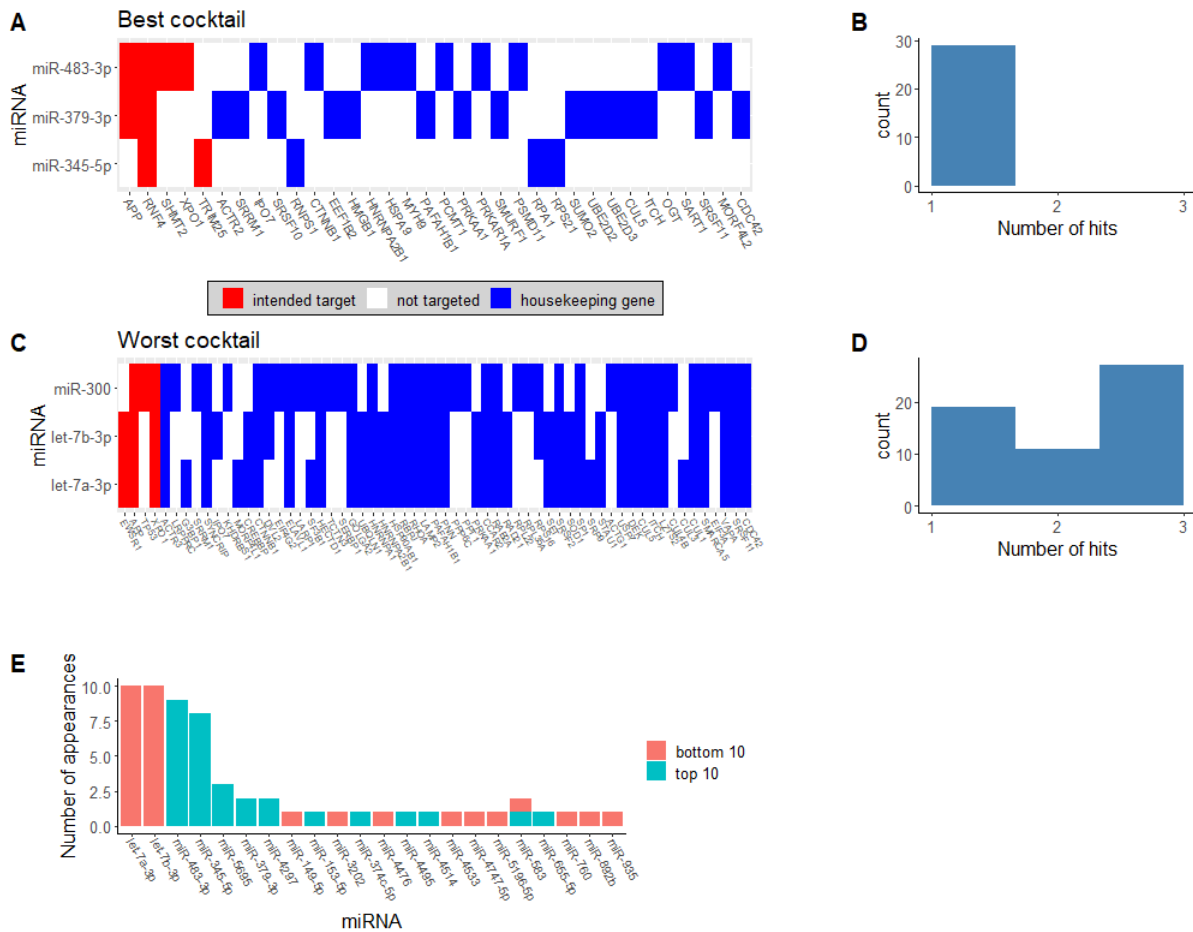

**Figure 5. We identified miR-483-3p, miR-379-3p, and miR-345-5p as the optimal 3-miRNA cocktail for Ewing Sarcoma therapy.** We identified cocktails that are predicted to maximally downregulate target genes (red shading on the figure), while avoiding downregulation of essential housekeeping genes to limit toxicity (blue shading on the figure). **Panel A** shows the targeting heatmap for the best predicted cocktail for cell line A673. The miRNA that make up the cocktail are presented on the y-axis. Putative gene targets are highlighted on the x-axis. Lines that span multiple miRNAs occur when a gene is downregulated by 2 or more miRNAs in the cocktail. **Panel B** shows a histogram of the number of microRNA that target a given housekeeping gene in the best cocktail. **Panel C** displays the targeting heatmap for the worst-performing cocktail for cell line A673 among those tested for reference. **Panel D** shows a histogram of the number of microRNA that target a given housekeeping gene in the worst predicted cocktail. **Panel E** shows a bar graph showing the miRNA that most frequently appear in either the bottom or top 10 predicted cocktails (averaged across cell lines) for Ewing Sarcoma therapy.

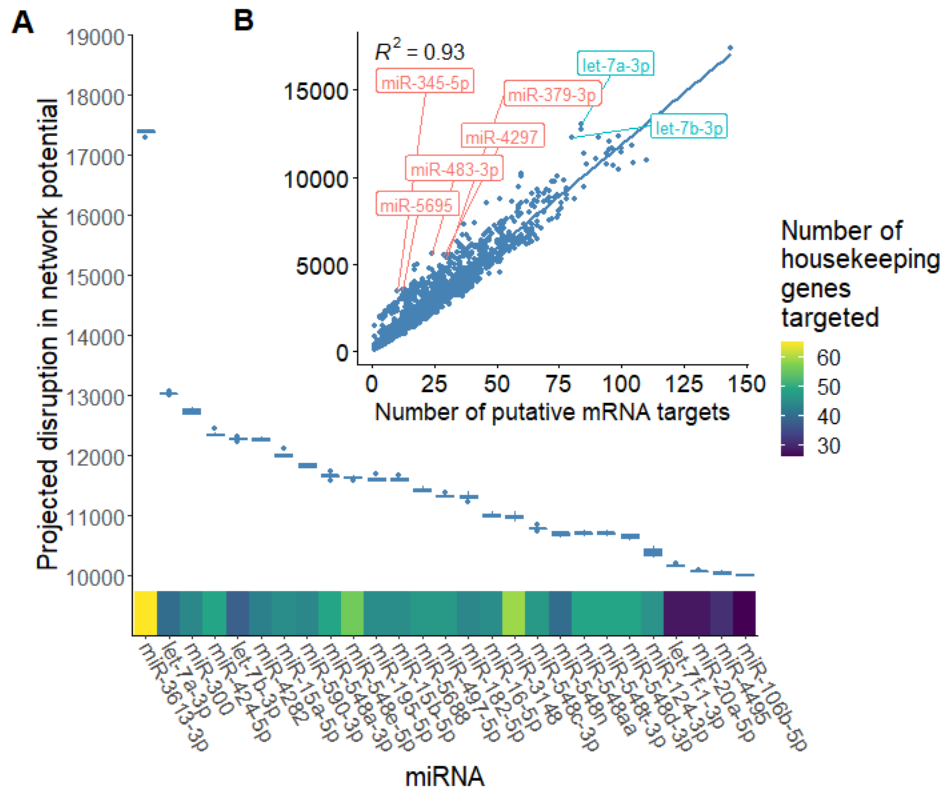

**Figure 6. Many of the most promising miRNA candidates repress large numbers of essential housekeeping genes.** We identified the top miRNA for treatment of Ewing sarcoma, ranked by their predicted disruption of the Ewing sarcoma cell signaling network. **A:** Boxplot showing the projected disruption in network potential for the top miRNA candidates (averaged across all samples). The heatmap on the x-axis describes the number of essential housekeeping genes that each miRNA is predicted to target. **B:** Scatterplot showing the relationship between projected network disruption and the number of putative mRNA targets for a given miRNA. Red labels indicate miRNA that appear in 2 or more of the top 10 predicted cocktails. Blue labels indicate miRNA that appear in 2 or more of the bottom 10 predicted cocktails.

## 248 Author contributions

|                        | DTW   | KIP   | DW    | JS    | SLL   | AD    | JGS   |
|------------------------|-------|-------|-------|-------|-------|-------|-------|
| Conceptualization      | Grey  | Grey  | Grey  | White | Grey  | Grey  | Grey  |
| Funding Acquisition    | White | Grey  | White | White | Grey  | White | Grey  |
| Supervision/Mentorship | White | White | White | White | Grey  | Grey  | Grey  |
| Conduct Experiments    | White | Grey  | White | White | White | White | White |
| Code                   | Grey  | White | Grey  | White | White | Grey  | White |
| Data analysis          | Grey  | White | Grey  | Grey  | White | Grey  | Grey  |
| Writing manuscript     | Grey  | White | White | White | White | White | Grey  |
| Editing Manuscript     | Grey  | Grey  | Grey  | Grey  | Grey  | Grey  | Grey  |

Figure 7. Grey denotes contribution

## 249 References

- 250 1. Mackintosh, C., Madoz-Gúrpide, J., Ordóñez, J. L., Osuna, D. & Herrero-Martín, D. The molecular pathogenesis of  
251 Ewing's sarcoma. *Cancer biology & therapy* **9**, 655–67 (2010).
- 252 2. Esiashvili, N., Goodman, M. & Marcus, R. B. Changes in Incidence and Survival of Ewing Sarcoma Patients Over the Past  
253 3 Decades. *J. Pediatr. Hematol.* **30**, 425–430, DOI: [10.1097/MPH.0b013e31816e22f3](https://doi.org/10.1097/MPH.0b013e31816e22f3) (2008).
- 254 3. Lawlor, E. R. & Sorensen, P. H. Twenty Years On – What Do We Really Know About Ewing Sarcoma And What Is The  
255 Path Forward? *Critical reviews oncogenesis* **20**, 155 (2015).
- 256 4. Riggi, N. *et al.* EWS-FLI-1 modulates miRNA145 and SOX2 expression to initiate mesenchymal stem cell reprogramming  
257 toward Ewing sarcoma cancer stem cells. *Genes & development* **24**, 916–32, DOI: [10.1101/gad.1899710](https://doi.org/10.1101/gad.1899710) (2010).
- 258 5. Rupaimoole, R. & Slack, F. J. MicroRNA therapeutics: towards a new era for the management of cancer and other diseases.  
259 *Nat. Rev. Drug Discov.* **16**, 203–222, DOI: [10.1038/nrd.2016.246](https://doi.org/10.1038/nrd.2016.246) (2017).
- 260 6. Dhawan, A., Scott, J. G., Harris, A. L. & Buffa, F. M. Pan-cancer characterisation of microRNA across cancer  
261 hallmarks reveals microRNA-mediated downregulation of tumour suppressors. *Nat. Commun.* **9**, 5228, DOI:  
262 [10.1038/s41467-018-07657-1](https://doi.org/10.1038/s41467-018-07657-1) (2018).
- 263 7. Hanahan, D. & Weinberg, R. A. The hallmarks of cancer. *cell* **100**, 57–70 (2000).
- 264 8. LIN, X., YANG, Z., ZHANG, P. & SHAO, G. miR-154 suppresses non-small cell lung cancer growth in vitro and in vivo.  
265 *Oncol. Reports* **33**, 3053–3060, DOI: [10.3892/or.2015.3895](https://doi.org/10.3892/or.2015.3895) (2015).
- 266 9. Lin, K. *et al.* Loss of *MIR15A* and *MIR16-1* at 13q14 is associated with increased *TP53* mRNA,  
267 de-repression of *BCL2* and adverse outcome in chronic lymphocytic leukaemia. *Br. J. Haematol.* **167**, 346–355,  
268 DOI: [10.1111/bjh.13043](https://doi.org/10.1111/bjh.13043) (2014).
- 269 10. Reilley, M. J. *et al.* STAT3 antisense oligonucleotide AZD9150 in a subset of patients with heavily pretreated lymphoma:  
270 results of a phase 1b trial. *J. for ImmunoTherapy Cancer* **6**, 119, DOI: [10.1186/s40425-018-0436-5](https://doi.org/10.1186/s40425-018-0436-5) (2018).
- 271 11. Hong, D. *et al.* AZD9150, a next-generation antisense oligonucleotide inhibitor of *STAT3* with early evidence of  
272 clinical activity in lymphoma and lung cancer. *Sci. Transl. Medicine* **7**, 185–314, DOI: [10.1126/scitranslmed.aac5272](https://doi.org/10.1126/scitranslmed.aac5272)  
273 (2015).
- 274 12. Odate, S. *et al.* Inhibition of *STAT3* with the Generation 2.5 Antisense Oligonucleotide, AZD9150, Decreases  
275 Neuroblastoma Tumorigenicity and Increases Chemosensitivity. *Clin. Cancer Res.* **23**, 1771–1784, DOI: [10.1158/  
276 1078-0432.CCR-16-1317](https://doi.org/10.1158/1078-0432.CCR-16-1317) (2017).

- 277 **13.** Kasinski, A. L. & Slack, F. J. miRNA-34 prevents cancer initiation and progression in a therapeutically resistant K-ras and  
278 p53-induced mouse model of lung adenocarcinoma. *Cancer research* **72**, 5576–87, DOI: [10.1158/0008-5472.CAN-12-2001](https://doi.org/10.1158/0008-5472.CAN-12-2001)  
279 (2012).
- 280 **14.** Wiggins, J. F. *et al.* Development of a Lung Cancer Therapeutic Based on the Tumor Suppressor MicroRNA-34. *Cancer*  
281 *Res.* **70**, 5923–5930, DOI: [10.1158/0008-5472.CAN-10-0655](https://doi.org/10.1158/0008-5472.CAN-10-0655) (2010).
- 282 **15.** Stahlhut, C. & Slack, F. J. Combinatorial Action of MicroRNAs *let-7* and miR-34 Effectively Synergizes with  
283 Erlotinib to Suppress Non-small Cell Lung Cancer Cell Proliferation. *Cell Cycle* **14**, 2171–2180, DOI: [10.1080/15384101.](https://doi.org/10.1080/15384101.2014.1003008)  
284 [2014.1003008](https://doi.org/10.1080/15384101.2014.1003008) (2015).
- 285 **16.** Liu, C. *et al.* The microRNA miR-34a inhibits prostate cancer stem cells and metastasis by directly repressing CD44. *Nat.*  
286 *medicine* **17**, 211–5, DOI: [10.1038/nm.2284](https://doi.org/10.1038/nm.2284) (2011).
- 287 **17.** Maciej Pajak, T. I. S. miRNAtap: miRNAtap: microRNA Targets— Aggregated Predictions., DOI: [10.18129](https://doi.org/10.18129) (2019).
- 288 **18.** Wong, N. & Wang, X. miRDB: an online resource for microRNA target prediction and functional annotations. *Nucleic*  
289 *Acids Res.* **43**, D146–D152, DOI: [10.1093/nar/gku1104](https://doi.org/10.1093/nar/gku1104) (2015).
- 290 **19.** Maragkakis, M. *et al.* DIANA-microT web server: elucidating microRNA functions through target prediction. *Nucleic*  
291 *Acids Res.* **37**, W273–W276, DOI: [10.1093/nar/gkp292](https://doi.org/10.1093/nar/gkp292) (2009).
- 292 **20.** O’Neill, V. A Multicenter Phase I Study of MRX34, MicroRNA miR-RX34 Liposomal Injection - Full Text View -  
293 ClinicalTrials.gov, DOI: [NCT01829971](https://doi.org/10.1186/17454219/1829971).
- 294 **21.** Rietman, E. A., Scott, J. G., Tuszynski, J. A. & Klement, G. L. Personalized anticancer therapy selection using molecular  
295 landscape topology and thermodynamics. *Oncotarget* **8**, 18735–18745, DOI: [10.18632/oncotarget.12932](https://doi.org/10.18632/oncotarget.12932) (2017).
- 296 **22.** Rietman, E. A., Platig, J., Tuszynski, J. A. & Lakka Klement, G. Thermodynamic measures of cancer: Gibbs free energy  
297 and entropy of protein-protein interactions. *J. biological physics* **42**, 339–50, DOI: [10.1007/s10867-016-9410-y](https://doi.org/10.1007/s10867-016-9410-y) (2016).
- 298 **23.** Rietman, E. & Tuszynski, J. A. Using Thermodynamic Functions as an Organizing Principle in Cancer Biology. 139–157,  
299 DOI: [10.1007/978-3-319-74974-7\\_8](https://doi.org/10.1007/978-3-319-74974-7_8) (Springer, Cham, 2018).
- 300 **24.** Pishas, K. I. *et al.* Therapeutic targeting of KDM1A/LSD1 in ewing sarcoma with SP-2509 engages the endoplasmic  
301 reticulum stress response. *Mol. Cancer Ther.* **17**, 1902–1916, DOI: [10.1158/1535-7163.MCT-18-0373](https://doi.org/10.1158/1535-7163.MCT-18-0373) (2018).
- 302 **25.** Oughtred, R. *et al.* The BioGRID interaction database: 2019 update. *Nucleic Acids Res.* **47**, D529–D541, DOI:  
303 [10.1093/nar/gky1079](https://doi.org/10.1093/nar/gky1079) (2019).
- 304 **26.** Zwiener, I., Frisch, B. & Binder, H. Transforming RNA-Seq Data to Improve the Performance of Prognostic Gene  
305 Signatures. *PLoS ONE* **9**, e85150, DOI: [10.1371/journal.pone.0085150](https://doi.org/10.1371/journal.pone.0085150) (2014).
- 306 **27.** Love, M. I., Huber, W. & Anders, S. Moderated estimation of fold change and dispersion for RNA-seq data with DESeq2.  
307 *Genome Biol.* **15**, 550, DOI: [10.1186/s13059-014-0550-8](https://doi.org/10.1186/s13059-014-0550-8) (2014).
- 308 **28.** Liu, Y., Beyer, A. & Aebersold, R. On the Dependency of Cellular Protein Levels on mRNA Abundance. *Cell* **165**, 535–50,  
309 DOI: [10.1016/j.cell.2016.03.014](https://doi.org/10.1016/j.cell.2016.03.014) (2016).
- 310 **29.** Vogel, C. & Marcotte, E. M. Insights into the regulation of protein abundance from proteomic and transcriptomic analyses.  
311 *Nat. Rev. Genet.* **13**, 227–232, DOI: [10.1038/nrg3185](https://doi.org/10.1038/nrg3185) (2012).
- 312 **30.** Li, J. J., Bickel, P. J. & Biggin, M. D. System wide analyses have underestimated protein abundances and the importance  
313 of transcription in mammals. *PeerJ* **2**, e270, DOI: [10.7717/peerj.270](https://doi.org/10.7717/peerj.270) (2014).
- 314 **31.** Jovanovic, M. *et al.* Dynamic profiling of the protein life cycle in response to pathogens. *Science* **347**, 1259038–1259038,  
315 DOI: [10.1126/science.1259038](https://doi.org/10.1126/science.1259038) (2015).
- 316 **32.** Nusinow, D. P. *et al.* Quantitative Proteomics of the Cancer Cell Line Encyclopedia. *Cell* **180**, 387–402.e16, DOI:  
317 [10.1016/j.cell.2019.12.023](https://doi.org/10.1016/j.cell.2019.12.023) (2020).
- 318 **33.** Albert, R., Jeong, H. & Barabási, A. L. Error and attack tolerance of complex networks. *Nature* **406**, 378–382, DOI:  
319 [10.1038/35019019](https://doi.org/10.1038/35019019) (2000).
- 320 **34.** Dhawan, A. *et al.* Collateral sensitivity networks reveal evolutionary instability and novel treatment strategies in ALK  
321 mutated non-small cell lung cancer. *Sci. Reports* **7**, 1232, DOI: [10.1038/s41598-017-00791-8](https://doi.org/10.1038/s41598-017-00791-8) (2017).
- 322 **35.** Enright, A. J. *et al.* MicroRNA targets in Drosophila. *Genome Biol.* **5**, R1, DOI: [10.1186/gb-2003-5-1-r1](https://doi.org/10.1186/gb-2003-5-1-r1) (2003).
- 323 **36.** Lall, S. *et al.* A Genome-Wide Map of Conserved MicroRNA Targets in C. elegans. *Curr. Biol.* **16**, 460–471, DOI:  
324 [10.1016/j.cub.2006.01.050](https://doi.org/10.1016/j.cub.2006.01.050) (2006).

- 325 **37.** Friedman, R. C., Farh, K. K.-H., Burge, C. B. & Bartel, D. P. Most mammalian mRNAs are conserved targets of  
326 microRNAs. *Genome Res.* **19**, 92–105, DOI: [10.1101/gr.082701.108](https://doi.org/10.1101/gr.082701.108) (2008).
- 327 **38.** Eisenberg, E. & Levanon, E. Y. Human housekeeping genes, revisited, DOI: [10.1016/j.tig.2013.05.010](https://doi.org/10.1016/j.tig.2013.05.010) (2013).
- 328 **39.** Stelzer, G. *et al.* The GeneCards Suite: From Gene Data Mining to Disease Genome Sequence Analyses. In *Current*  
329 *Protocols in Bioinformatics*, vol. 54, 1–1, DOI: [10.1002/cpbi.5](https://doi.org/10.1002/cpbi.5) (John Wiley & Sons, Inc., Hoboken, NJ, USA, 2016).
- 330 **40.** Tate, J. G. *et al.* COSMIC: the Catalogue Of Somatic Mutations In Cancer. *Nucleic Acids Res.* **47**, D941–D947, DOI:  
331 [10.1093/nar/gky1015](https://doi.org/10.1093/nar/gky1015) (2019).
- 332 **41.** Liberzon, A. *et al.* Molecular signatures database (MSigDB) 3.0. *Bioinformatics* **27**, 1739–1740, DOI: [10.1093/](https://doi.org/10.1093/bioinformatics/btr260)  
333 [bioinformatics/btr260](https://doi.org/10.1093/bioinformatics/btr260) (2011).
- 334 **42.** Liberzon, A. *et al.* The Molecular Signatures Database Hallmark Gene Set Collection. *Cell Syst.* **1**, 417–425, DOI:  
335 [10.1016/j.cels.2015.12.004](https://doi.org/10.1016/j.cels.2015.12.004) (2015).
- 336 **43.** Korotkevich, G., Sukhov, V. & Sergushichev, A. A. An algorithm for fast preranked gene set enrichment analysis using  
337 cumulative statistic calculation. *bioRxiv* 060012, DOI: [10.1101/060012](https://doi.org/10.1101/060012) (2016).
- 338 **44.** Benjamini, Y., Yoav ; Hochberg. Controlling the False Discovery Rate - a Practical and Powerful Approach to Multiple  
339 Testing. Journal of the Royal Statistical Society Series B-Methodological 1995.pdf. *J. Royal Stat. Soc. Ser. B (Methodological)*  
340 **57**, 289–300, DOI: [10.2307/2346101](https://doi.org/10.2307/2346101) (1995).
- 341 **45.** Hameiri-Grossman, M. *et al.* The association between let-7, RAS and HIF-1 in Ewing Sarcoma tumor growth. *Oncotarget*  
342 **6**, 33834–48, DOI: [10.18632/oncotarget.5616](https://doi.org/10.18632/oncotarget.5616) (2015).
- 343 **46.** Guo, M., Zhao, X., Yuan, X., Jiang, J. & Li, P. MiR-let-7a inhibits cell proliferation, migration, and invasion by  
344 down-regulating PKM2 in cervical cancer. *Oncotarget* **8**, 28226–28236, DOI: [10.18632/oncotarget.15999](https://doi.org/10.18632/oncotarget.15999) (2017).
- 345 **47.** Tang, R. *et al.* MiR-let-7a inhibits cell proliferation, migration, and invasion by down-regulating PKM2 in gastric cancer.  
346 *Oncotarget* **7**, 5972–84, DOI: [10.18632/oncotarget.6821](https://doi.org/10.18632/oncotarget.6821) (2016).
- 347 **48.** Pan, X.-M. *et al.* A let-7 KRAS rs712 polymorphism increases colorectal cancer risk. *Tumor Biol.* **35**, 831–835, DOI:  
348 [10.1007/s13277-013-1114-3](https://doi.org/10.1007/s13277-013-1114-3) (2014).
- 349 **49.** Wang, R. *et al.* miR-300 regulates the epithelial-mesenchymal transition and invasion of hepatocellular carcinoma by  
350 targeting the FAK/PI3K/AKT signaling pathway. *Biomed. & Pharmacother.* **103**, 1632–1642, DOI: [10.1016/J.BIOPHA.](https://doi.org/10.1016/J.BIOPHA.2018.03.005)  
351 [2018.03.005](https://doi.org/10.1016/J.BIOPHA.2018.03.005) (2018).
- 352 **50.** Liang, H.-q. *et al.* The PTTG1-targeting miRNAs miR-329, miR-300, miR-381, and miR-655 inhibit pituitary tumor  
353 cell tumorigenesis and are involved in a p53/PTTG1 regulation feedback loop. *Oncotarget* **6**, 29413–27, DOI: [10.18632/](https://doi.org/10.18632/oncotarget.5003)  
354 [oncotarget.5003](https://doi.org/10.18632/oncotarget.5003) (2015).
- 355 **51.** Wang, J., Wang, S., Zhou, J. & Qian, Q. miR-424-5p regulates cell proliferation, migration and invasion by targeting  
356 doublecortin-like kinase 1 in basal-like breast cancer. *Biomed. & Pharmacother.* **102**, 147–152, DOI: [10.1016/J.BIOPHA.](https://doi.org/10.1016/J.BIOPHA.2018.03.018)  
357 [2018.03.018](https://doi.org/10.1016/J.BIOPHA.2018.03.018) (2018).
- 358 **52.** J. Zhao, G.-Q. J. MiR-4282 inhibits proliferation, invasion and metastasis of human breast cancer by targeting Myc. *Eur.*  
359 *review for medical pharmacological sciences* DOI: [10.26355/eurrev/201812/16643](https://doi.org/10.26355/eurrev/201812/16643) (2018).
- 360 **53.** Alderman, C. & Yang, Y. The anti-melanoma activity and oncogenic targets of hsa-miR-15a-5p. *RNA & disease (Houston,*  
361 *Tex.)* **3** (2016).
- 362 **54.** Rohini, M., Gokulnath, M., Miranda, P. & Selvamurugan, N. miR-590-3p inhibits proliferation and promotes apoptosis by  
363 targeting activating transcription factor 3 in human breast cancer cells. *Biochimie* **154**, 10–18, DOI: [10.1016/J.BIOCHI.](https://doi.org/10.1016/J.BIOCHI.2018.07.023)  
364 [2018.07.023](https://doi.org/10.1016/J.BIOCHI.2018.07.023) (2018).
- 365 **55.** Ge, X. & Gong, L. MiR-590-3p suppresses hepatocellular carcinoma growth by targeting TEAD1. *Tumor Biol.* **39**,  
366 101042831769594, DOI: [10.1177/1010428317695947](https://doi.org/10.1177/1010428317695947) (2017).
- 367 **56.** Lin, S. & Gregory, R. I. MicroRNA biogenesis pathways in cancer. DOI: [10.1038/nrc3932](https://doi.org/10.1038/nrc3932) (2015).



## 368 Supplemental Materials

### 369 3.1 Additional Analyses

370 As described in the main text, we ranked proteins according to their contribution to network stability by calculating the change  
371 in network potential following complete *in silico* repression of each protein. In the main text, we limited our analysis to proteins  
372 that had been causally implicated in cancer according to the cosmic database<sup>40</sup>. Here, we present the top 50 proteins (when  
373 network potential for all 6 cell lines was averaged) ranked by contribution to network stability, not limited to proteins that were  
374 causally implicated in cancer (Figure 4).

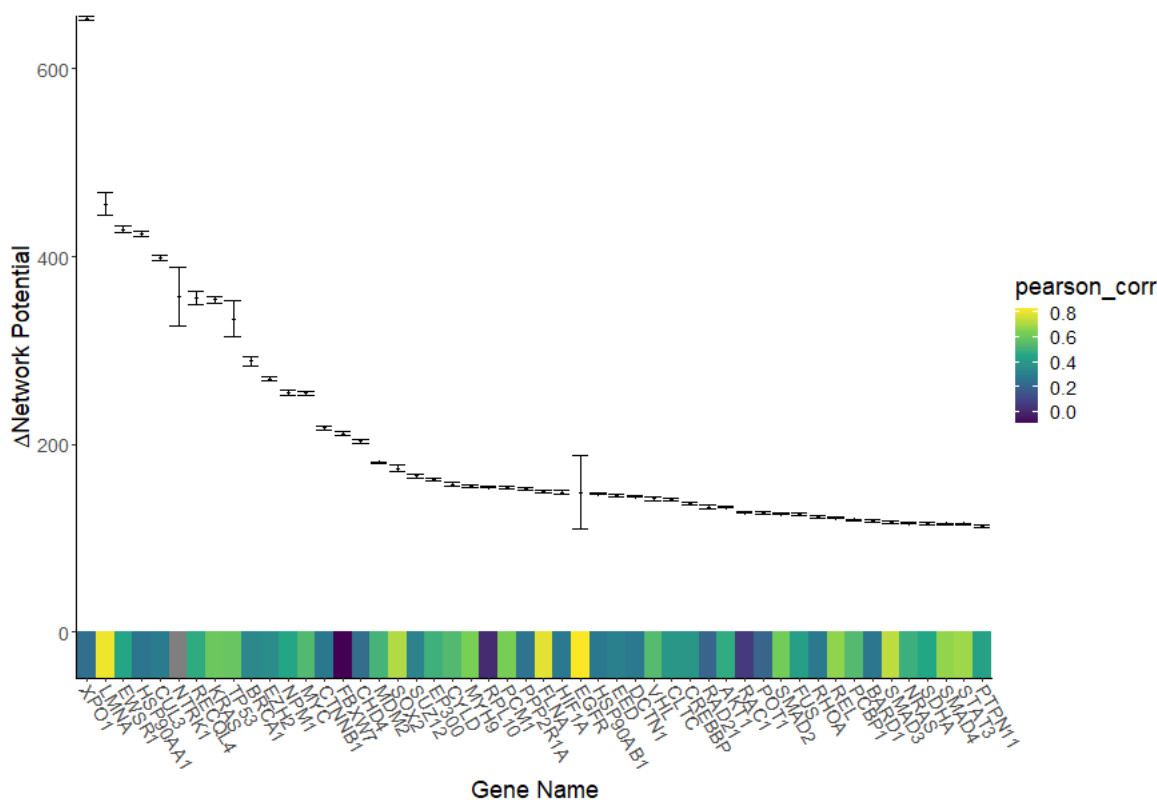

**Figure S1. Protein targets ranked by contribution to network stability.** When averaging across cell lines, XPO1, LMNA, EWSR1, HSP90AA1, and CUL3 were identified as the most important proteins in the Ewing sarcoma cell signaling network (when limiting our analysis to proteins causally implicated in cancer<sup>40</sup>). When each protein was simulated as completely repressed *in silico*, network potential was increased by 654, 456, 429, 425, and 399, respectively. The heatmap at the bottom of the plot describes the protein-mRNA correlation for each gene in the cancer cell line atlas. Grey indicates no data was available. It is reassuring that EWSR1, the kinase associated with Ewing sarcoma development, is identified as highly influential in the cell signaling network by this method.

375 We also analyzed each cell line individually to identify the top protein targets for each cell line. In the main text, we limited  
376 this analysis to proteins that had been causally implicated in cancer<sup>40</sup>. Here, we present the top protein targets for each cell line,  
377 not limited to those proteins that had previously been causally implicated in cancer (Table S1).

378 **Gene set enrichment analysis** We conducted gene set enrichment analysis, using all genes in our Ewing sarcoma cell  
379 signaling network as the gene set. We ranked this set of genes by change in network potential and used the “hallmarks” pathways  
380 set from the Molecular Signatures Database as the genomic background<sup>41,42</sup>. We also included a gene set corresponding to  
381 the miRNA biogenesis pathway<sup>56</sup>. We used the “fgsea” R package version 1.8.0 to conduct the analysis using the following  
382 settings: nperm = 500, minSize = 1, maxSize = ∞, nproc = 0, gseaParam = 1, BPPARAM = NULL<sup>43</sup>. We found our gene set  
383 to be significantly enriched in several pathways related to oncogenesis, including DNA repair, apoptosis, and MTOR signaling  
384 (Table S3). These results indicate that network potential can identify a cancer-specific signal from mRNA expression data.

|    | TC252  | ES2    | A673   | TC32   | EWS502 | TC71   |
|----|--------|--------|--------|--------|--------|--------|
| 1  | TRIM25 | TRIM25 | TRIM25 | TRIM25 | TRIM25 | TRIM25 |
| 2  | APP    | APP    | APP    | APP    | APP    | APP    |
| 3  | ELAVL1 | ELAVL1 | ELAVL1 | ELAVL1 | ELAVL1 | ELAVL1 |
| 4  | RNF4   | RNF4   | RNF4   | RNF4   | RNF4   | RNF4   |
| 5  | HNRNPL | HNRNPL | HNRNPL | HNRNPL | HNRNPL | HNRNPL |
| 6  | XPO1   | XPO1   | XPO1   | XPO1   | XPO1   | XPO1   |
| 7  | NXF1   | NXF1   | NXF1   | NXF1   | NXF1   | NXF1   |
| 8  | UBC    | TNIP2  | UBC    | UBC    | UBC    | UBC    |
| 9  | TNIP2  | UBC    | TNIP2  | TNIP2  | TNIP2  | TNIP2  |
| 10 | MOV10  | MOV10  | MOV10  | MOV10  | MOV10  | MOV10  |

**Table S1. Top protein targets for each cell line.** We ranked potential targets by predicted change in network potential when each protein was modeled as repressed.

|    | TC252           | ES2             | A673            | TC32            | EWS502          | TC71            |
|----|-----------------|-----------------|-----------------|-----------------|-----------------|-----------------|
| 1  | <b>XPO1</b>     | <b>XPO1</b>     | <b>XPO1</b>     | <b>XPO1</b>     | <b>XPO1</b>     | <b>XPO1</b>     |
| 2  | <b>LMNA</b>     | <b>LMNA</b>     | <b>LMNA</b>     | <b>LMNA</b>     | NTRK1           | EWSR1           |
| 3  | EWSR1           | <b>HSP90AA1</b> | <b>HSP90AA1</b> | EWSR1           | <b>HSP90AA1</b> | LMNA            |
| 4  | <b>HSP90AA1</b> | <b>EWSR1</b>    | <b>EWSR1</b>    | <b>HSP90AA1</b> | <b>EWSR1</b>    | <b>HSP90AA1</b> |
| 5  | <b>CUL3</b>     | <b>CUL3</b>     | <b>CUL3</b>     | <b>CUL3</b>     | LMNA            | <b>CUL3</b>     |
| 6  | <b>NTRK1</b>    | KRAS            | <b>NTRK1</b>    | <b>NTRK1</b>    | CUL3            | RECQL4          |
| 7  | <b>TP53</b>     | <b>TP53</b>     | RECQL4          | <b>TP53</b>     | RECQL4          | KRAS            |
| 8  | RECQL4          | RECQL4          | KRAS            | KRAS            | TP53            | NTRK1           |
| 9  | KRAS            | EGFR            | TP53            | RECQL4          | KRAS            | BRCA1           |
| 10 | <b>BRCA1</b>    | <b>BRCA1</b>    | <b>BRCA1</b>    | <b>BRCA1</b>    | <b>BRCA1</b>    | TP53            |

**Table S2. Top cancer-associated protein targets for each cell line.** We ranked potential targets by predicted change in network potential when each protein was modeled as repressed, limited to proteins causally associated in cancer according to the Cosmic database. Proteins that appear in the same position for  $\geq 3$  cell lines are **bolded**.

|    | pathway                    | pval | padj | ES   | NES  | nMoreExtreme | size |
|----|----------------------------|------|------|------|------|--------------|------|
| 1  | MITOTIC_SPINDLE            | 0.00 | 0.01 | 0.62 | 1.47 | 0.00         | 197  |
| 2  | DNA_REPAIR                 | 0.00 | 0.01 | 0.59 | 1.37 | 0.00         | 146  |
| 3  | G2M_CHECKPOINT             | 0.00 | 0.01 | 0.72 | 1.68 | 0.00         | 187  |
| 4  | APOPTOSIS                  | 0.00 | 0.01 | 0.62 | 1.44 | 0.00         | 158  |
| 5  | PROTEIN_SECRETION          | 0.00 | 0.01 | 0.63 | 1.44 | 0.00         | 94   |
| 6  | APICAL_SURFACE             | 0.00 | 0.01 | 0.73 | 1.57 | 0.00         | 42   |
| 7  | UNFOLDED_PROTEIN_RESPONSE  | 0.00 | 0.01 | 0.62 | 1.43 | 0.00         | 106  |
| 8  | PI3K_AKT_MTOR_SIGNALING    | 0.00 | 0.01 | 0.69 | 1.58 | 0.00         | 104  |
| 9  | MTORC1_SIGNALING           | 0.00 | 0.01 | 0.61 | 1.43 | 0.00         | 193  |
| 10 | E2F_TARGETS                | 0.00 | 0.01 | 0.72 | 1.69 | 0.00         | 195  |
| 11 | MYC_TARGETS_V1             | 0.00 | 0.01 | 0.80 | 1.89 | 0.00         | 193  |
| 12 | OXIDATIVE_PHOSPHORYLATION  | 0.00 | 0.01 | 0.61 | 1.42 | 0.00         | 184  |
| 13 | ALLOGRAFT_REJECTION        | 0.00 | 0.01 | 0.54 | 1.27 | 0.00         | 191  |
| 14 | MIRNA_BIOGENESIS           | 0.00 | 0.01 | 0.80 | 1.73 | 0.00         | 40   |
| 15 | WNT_BETA_CATENIN_SIGNALING | 0.01 | 0.02 | 0.68 | 1.47 | 2.00         | 42   |
| 16 | ANGIOGENESIS               | 0.01 | 0.02 | 0.72 | 1.53 | 2.00         | 34   |
| 17 | TGF_BETA_SIGNALING         | 0.01 | 0.03 | 0.65 | 1.43 | 4.00         | 53   |
| 18 | MYC_TARGETS_V2             | 0.01 | 0.03 | 0.64 | 1.41 | 4.00         | 58   |
| 19 | P53_PATHWAY                | 0.01 | 0.03 | 0.51 | 1.19 | 5.00         | 194  |
| 20 | UV_RESPONSE_UP             | 0.01 | 0.04 | 0.53 | 1.23 | 6.00         | 153  |
| 21 | SPERMATOGENESIS            | 0.02 | 0.04 | 0.54 | 1.24 | 7.00         | 126  |
| 22 | ADIPOGENESIS               | 0.02 | 0.04 | 0.50 | 1.18 | 8.00         | 191  |
| 23 | INTERFERON_GAMMA_RESPONSE  | 0.02 | 0.04 | 0.50 | 1.18 | 8.00         | 193  |
| 24 | INTERFERON_ALPHA_RESPONSE  | 0.02 | 0.05 | 0.56 | 1.28 | 10.00        | 91   |

**Table S3. Genes ranked by network potential are enriched for several biological pathways related to cancer as well as the miRNA bio-genesis pathway** Pathways with an adjusted p-value < 0.05 are shown above. “ES” refers to enrichment score and “NES” refers to the normalized enrichment score. “nMoreExtreme” refers to the number of random gene sets (out of 500) that were more enriched than the test set. Size refers to the number of genes in the pathway that were also present in our mRNA expression dataset.
